# Supplementary material
Source: Springer Nature journal article supplement (https://www.springermedizin.de/resource/supplementary/12937_2012_493_MOESM1_ESM.pdf/25653426)
Supplement: MOESM1 [file 25653426]

# of articles identified through  
MEDLINE searching  
Limits: English-language articles  
between Jan 1990 and June 2011  
n = 676

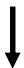

# of articles screened on the basis  
of titles and abstracts  
n = 676

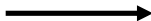

# of articles excluded because  
of failure to meet inclusion  
criteria  
n = 641

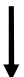

# of full text articles accessed  
and screened for eligibility  
n = 35

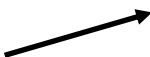

# of articles excluded because of  
failure to meet inclusion criteria  
n = 13

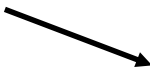

# of articles identified and  
included from the bibliography of  
the selected 52 articles  
n = 4

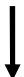

# of articles included in final  
qualitative synthesis  
n = 26
